# Supplementary material for: Over-expression of the miR-483-3p overcomes the miR-145/TP53 pro-apoptotic loop in hepatocellular carcinoma
Source: PubMed Central journal article supplement (PMC5058762; doi:10.18632/oncotarget.8913), 2016-04-22
Supplement: oncotarget-07-31361-s001.pdf [file oncotarget-07-31361-s001.pdf]

## SUPPLEMENTARY FIGURES AND TABLE

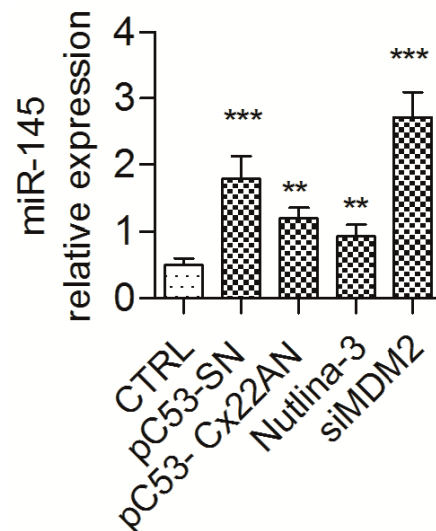

**Supplementary Figure S1: TP53 induced *miR-145-5p* expression.** *MiR-145-5p* levels were measured by quantitative real time PCR in HepG2 cells treated with plasmids (PC53-SN and PC53-Cx22AN), a drug (Nutlin-3a) or siRNA (siMDM2) able to induce p53 activation in cells. In all conditions *miR-145* expression significantly increased compared to not treated cells (CTRL).

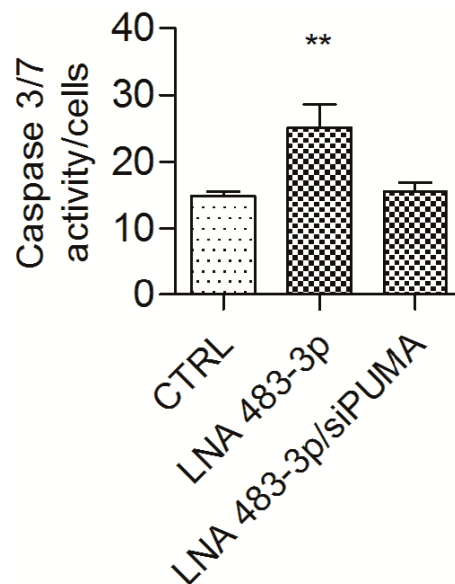

**Supplementary Figure S2: LNA anti-*miR-483* triggers cell death in *miR-145-5p* stable cell clone through PUMA activation.** Caspase 3/7 activity was evaluated in H9 *miR-145* stable cell clone after 72h from transfection with an anti-*miR-483-3p* LNA oligonucleotide alone or in combination with a siRNA against *BBC3* mRNA, using Caspase-Glo® 3/7 Assay kit (Promega). Anti-*miR-483-3p* LNA was responsible for an increase in caspase activity, that appeared significantly reduced where cotransfected with anti-PUMA siRNA.

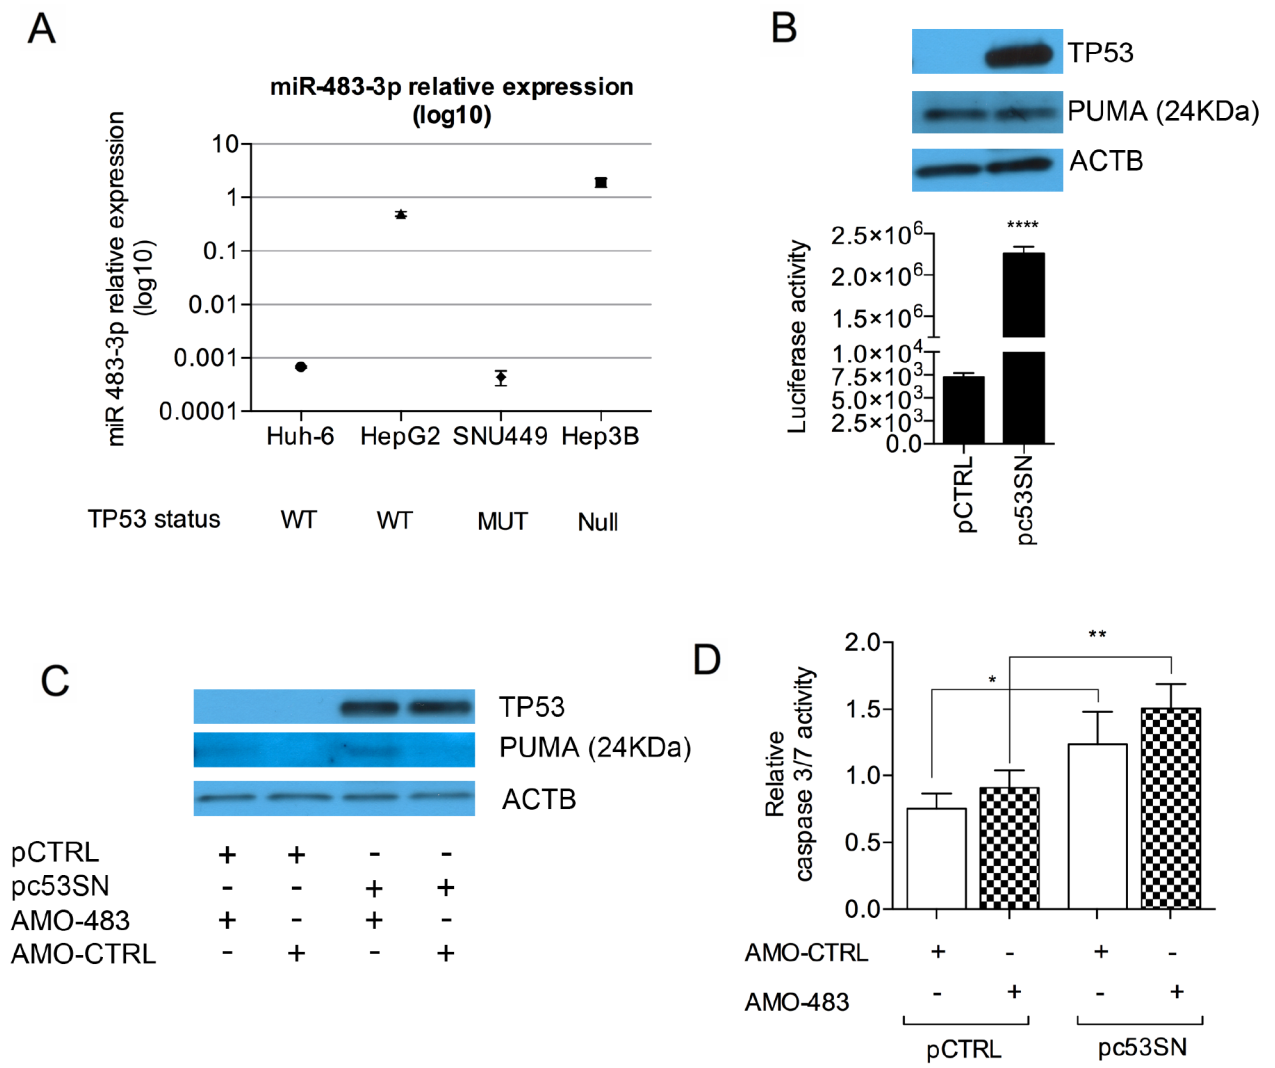

**Supplementary Figure S3: Evaluation of *miR-145-5p*/TP53/*miR-483-3p* signalling of Hep3B cells.** **A.** *miR-483-3p* relative expression by RT-qPCR in four liver cancer cell lines with different status of TP53; wild type (WT) in Huh-6 and HepG2 cells, mutated (MUT) in SNU449 and homozygously deleted (Null) in Hep3B cells. **B.** Hep3B cells transfected with the Empty expressing vector (pCTRL) or the TP53 wild type expressing vector (pC53SN) were analysed by western blot to measure the PUMA and TP53 protein levels.  $\beta$ -actin (ACTB) were used to evaluate the total protein loading (upper panel B). The lower panel B shows the ability to activate the transcription of the luciferase gene of the reporter vector pp53-TA-Luc containing the TP53 responsive element by exogenous expression of TP53. **C.** Western blot analysis of TP53, PUMA and  $\beta$ -actin (ACTB) in Hep3B cells. Cells were transfected with either the empty expressing vector (pCTRL) or the TP53 wild type expressing vector (pC53SN), the anti-miR control (AMO-CTRL) or the anti-miR-483-3p (AMO-483). **D.** Caspase 3/7 activity in Hep3B cells transfected with the empty expressing vector (pCTRL) or the TP53 wild type expressing vector (pC53SN) and the anti-miR control (AMO-CTRL) or the anti-miR-483-3p (AMO-483).

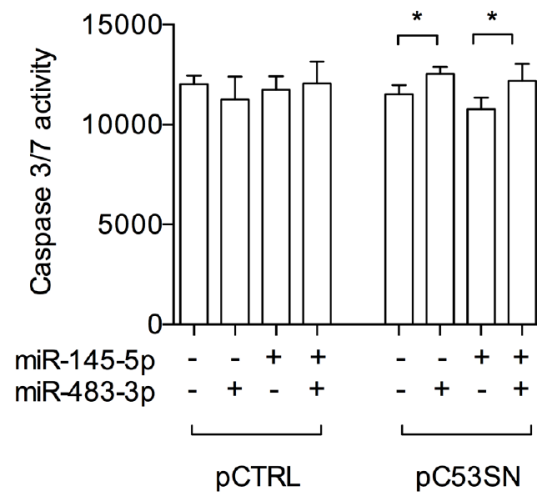

Supplementary Figure S4: Caspase 3/7 activity in SNU449 cells transfected with *miR-145-5p* (+), *miR-483-3p* (+) or control (NC1, -), the empty expressing vector (pCTRL) or the TP53 wild type expressing vector (pC53SN).

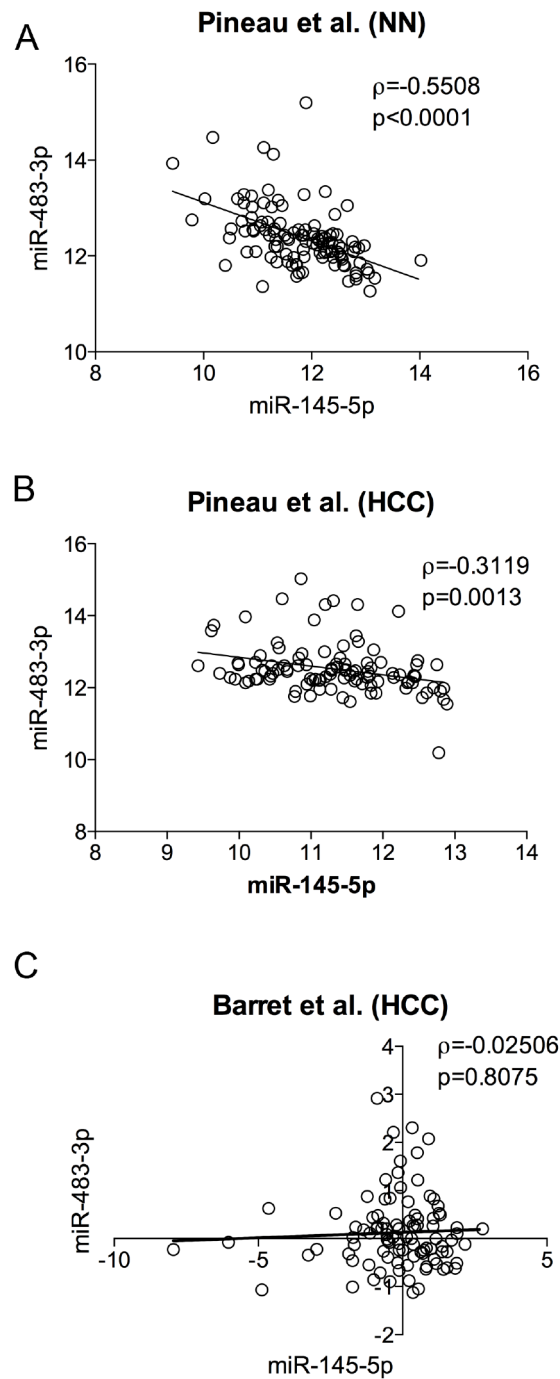

**Supplementary Figure S5: Correlation between *miR-145-5p* and *miR-483-3p* expression in clinical samples of HCC or healthy liver.** microRNA expression data were obtained from Array Express, from two different data set: E-TABM-866 **A, B**. (MicroRNA profiling of human hepatocellular carcinoma samples shows *miR-221* overexpression contributes to liver tumorigenesis) and E-GEOD-30297 **C**. (Micro RNA expression from human hepatocellular carcinoma (HCC) specimens from patients undergoing liver transplantation). The inverse correlation between *miR-145-5p* and *miR-483-3p* in non neoplastic livers (NN) (**A**) was lost in hepatocellular carcinoma samples (HCC) (**B-C**).

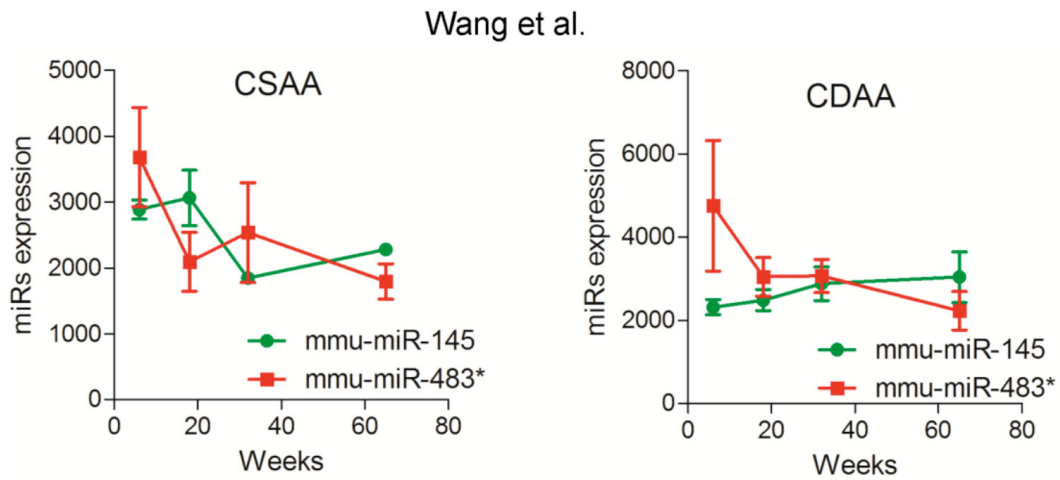

**Supplementary Figure S6: mmu-miR-145 and mmu-miR-483\* expressions in C57BL/6 male mice (6 weeks old) fed with CSAA (choline sufficient, amino acid-defined diet) or CDAA (Lombardi's choline-deficient, low methionine and amino acids-defined diet) diet.** As described by Wang et al., five mice were used in each diet group for each time point (6, 18, 32, 65 weeks).

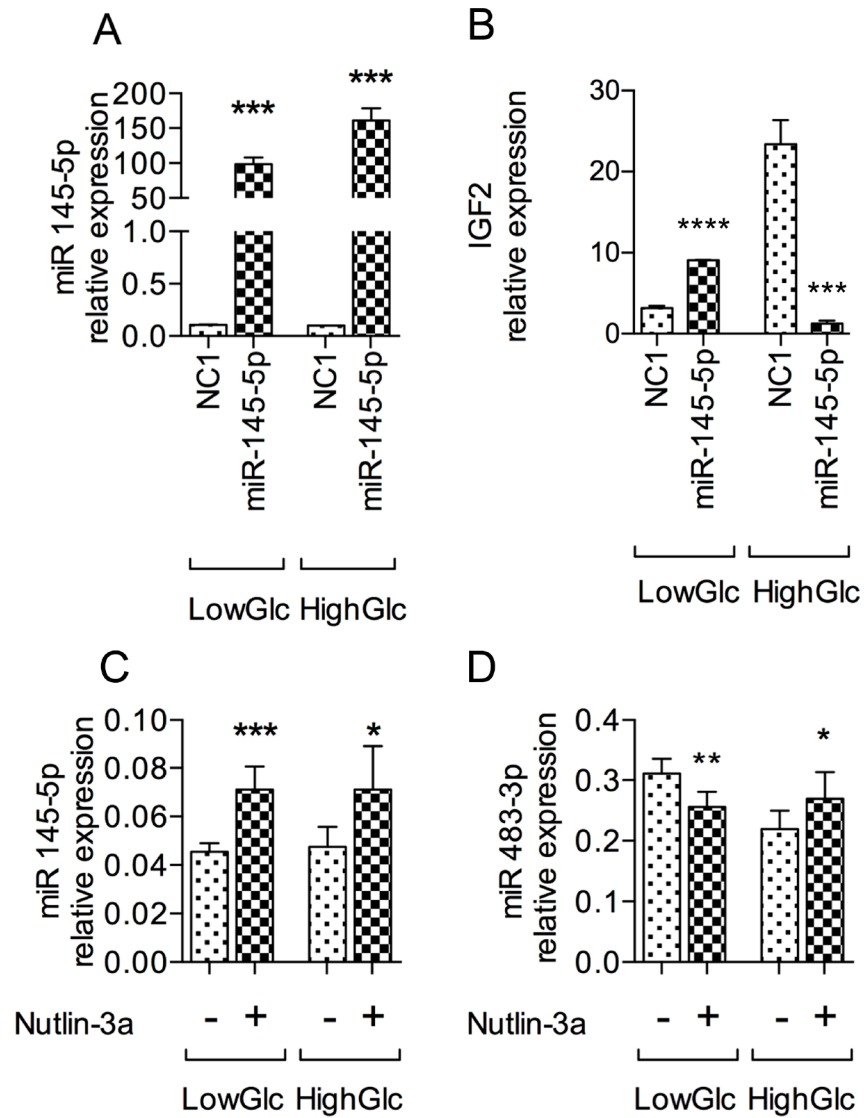

**Supplementary Figure S7:** **A.** *miR-145-5p* and **B.** *IGF2* (relative expression by RT-qPCR in HepG2 cells transfected with the scramble sequence NC1 and the mimic *miR-145-5p* in both low (LowGlc) and high glucose (HighGlc) conditions. **C.** *miR-145-5p* and **D.** *miR-483-3p* (relative expressions by RT-qPCR in HepG2 cells treated with 2.5  $\mu$ M Nutlin-3a for 19 hours in both low (LowGlc) and high glucose (HighGlc)).

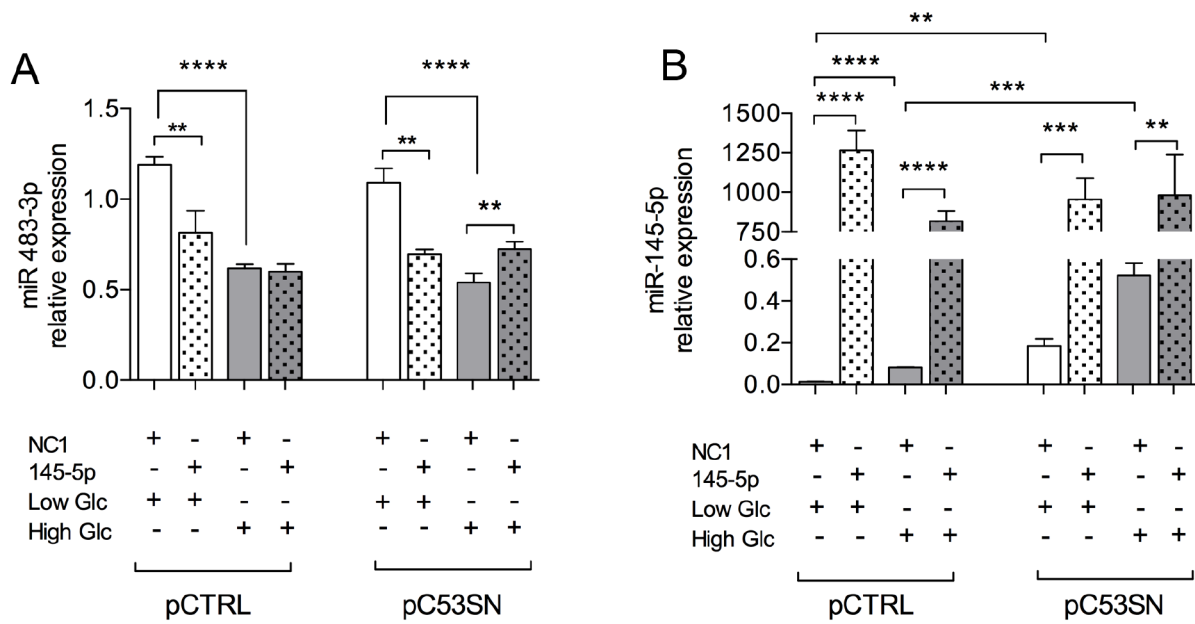

**Supplementary Figure S8: A. *miR-483-3p* and B. *mir-145-5p* relative expression by RT-qPCR normalized on *RNU44* in Hep3B cells transfected with either *miR-145-5p* or negative control miR (NC1) and either the empty expressing vector (pCTRL) or the TP53 wild type expressing vector (pC53SN); cells were grown in either low (LowGlc) or high (HighGlc) glucose concentration (1 g/L and 4.5 g/L respectively).**

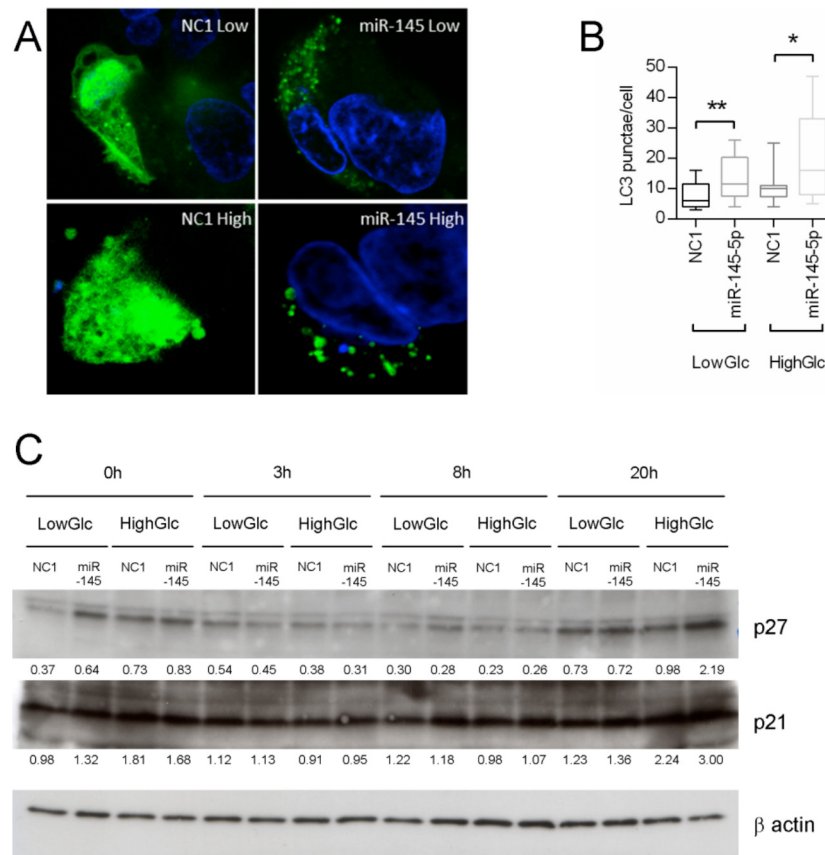

**Supplementary Figure S9: A. GFP-LC3 Puncta Formation Assays.** To monitoring cellular autophagic activity, HepG2 cells were seeded at midconfluence in an 8 well BD Falcon™ CultureSlides (Becton-Dickinson). The cells were transfected with a GFP-LC3 plasmid and with the scramble sequence NC1, the mimic miR-145-5p or the mimic miR-483-3p, in both low (LowGlc) and high glucose (HighGlc) conditions. After 48h cells were fixed with 2% paraformaldehyde in PBS for 10 min and were washed three times 4 min each with PBS. Following fixation, cells were incubate 60 min in 0,3% Triton™ X-100 (Sigma) in PBS+ (PBS, 5% FBS, 0,02% sodium azide and 10 mg/ml BSA), washed two times with PBS+ (4 min each rinse) and then incubated with DRAQ5 (Cell Signaling Technology) to DNA detection. Coverslip were mounted with SlowFade® Gold antifade reagent (Life Technologies). All confocal images were obtained using a Carl Zeiss LSM510 META system equipped with a Zeiss Axiovert 200 upright microscope and a Plan Neofluar oil-immersion objective (63X). **B.** Quantification of GFP-LC3 puncta per cell was performed using Image J software in more than 20 cells for each condition. *P* value is the result of the unpaired t test two-tailed. Error bars represent SD. **C.** Western blot analysis of HepG2 cells transfected with miR-145-5p mimic (miR-145) or negative control (NC1) in both glucose conditions (LowGlc and HighGlc) to determine the protein expression levels of p27 and p21 at 0, 3, 8 and 20 hours after transfection.



Supplementary Table S1: Characteristics of HCC patients enrolled in the study

|                                 |    |
|---------------------------------|----|
| CL                              | 40 |
| HCC                             | 21 |
| NL                              | 1  |
| <hr/>                           |    |
| <b>Total patients (HCC)</b>     | 21 |
| <b>Males</b>                    | 12 |
| <b>Females</b>                  | 5  |
| <b>Unknown</b>                  | 4  |
| <b>HBV +</b>                    | 4  |
| <b>HBV -</b>                    | 14 |
| <b>Not determined</b>           | 3  |
| <b>HCV +</b>                    | 13 |
| <b>HCV -</b>                    | 6  |
| <b>Not determined</b>           | 2  |
| <b>Ethanol abuse +</b>          | 3  |
| <b>Ethanol abuse -</b>          | 14 |
| <b>Not determined</b>           | 4  |
| <b>HCC grade 1</b>              | 0  |
| <b>HCC grade 2</b>              | 2  |
| <b>HCC grade 3</b>              | 12 |
| <b>HCC grade 4</b>              | 0  |
| <b>Not determined</b>           | 7  |
| <b>HCC size &lt;50 mm</b>       | 12 |
| <b>HCC size ≥50; &lt;100 mm</b> | 3  |
| <b>HCC size ≥100 mm</b>         | 1  |
| <b>Not determined</b>           | 5  |

Abbreviation: HBV, hepatitis B virus;

HCV, hepatitis C virus;

ethanol, history of ethanol abuse;

Grading of the HCC was assessed according to Edmonson and Steiner's criteria.
